# Supplementary figures and images for: Prediction error demarcates the transition from retrieval, to reconsolidation, to new learning
Source: PubMed Central journal article supplement — Learn Mem. 2014 Nov;21(11):580–4. doi: 10.1101/lm.035493.114 (PMC4201815; doi:10.1101/lm.035493.114), 2014-11

# A Figure S1\_Kindt

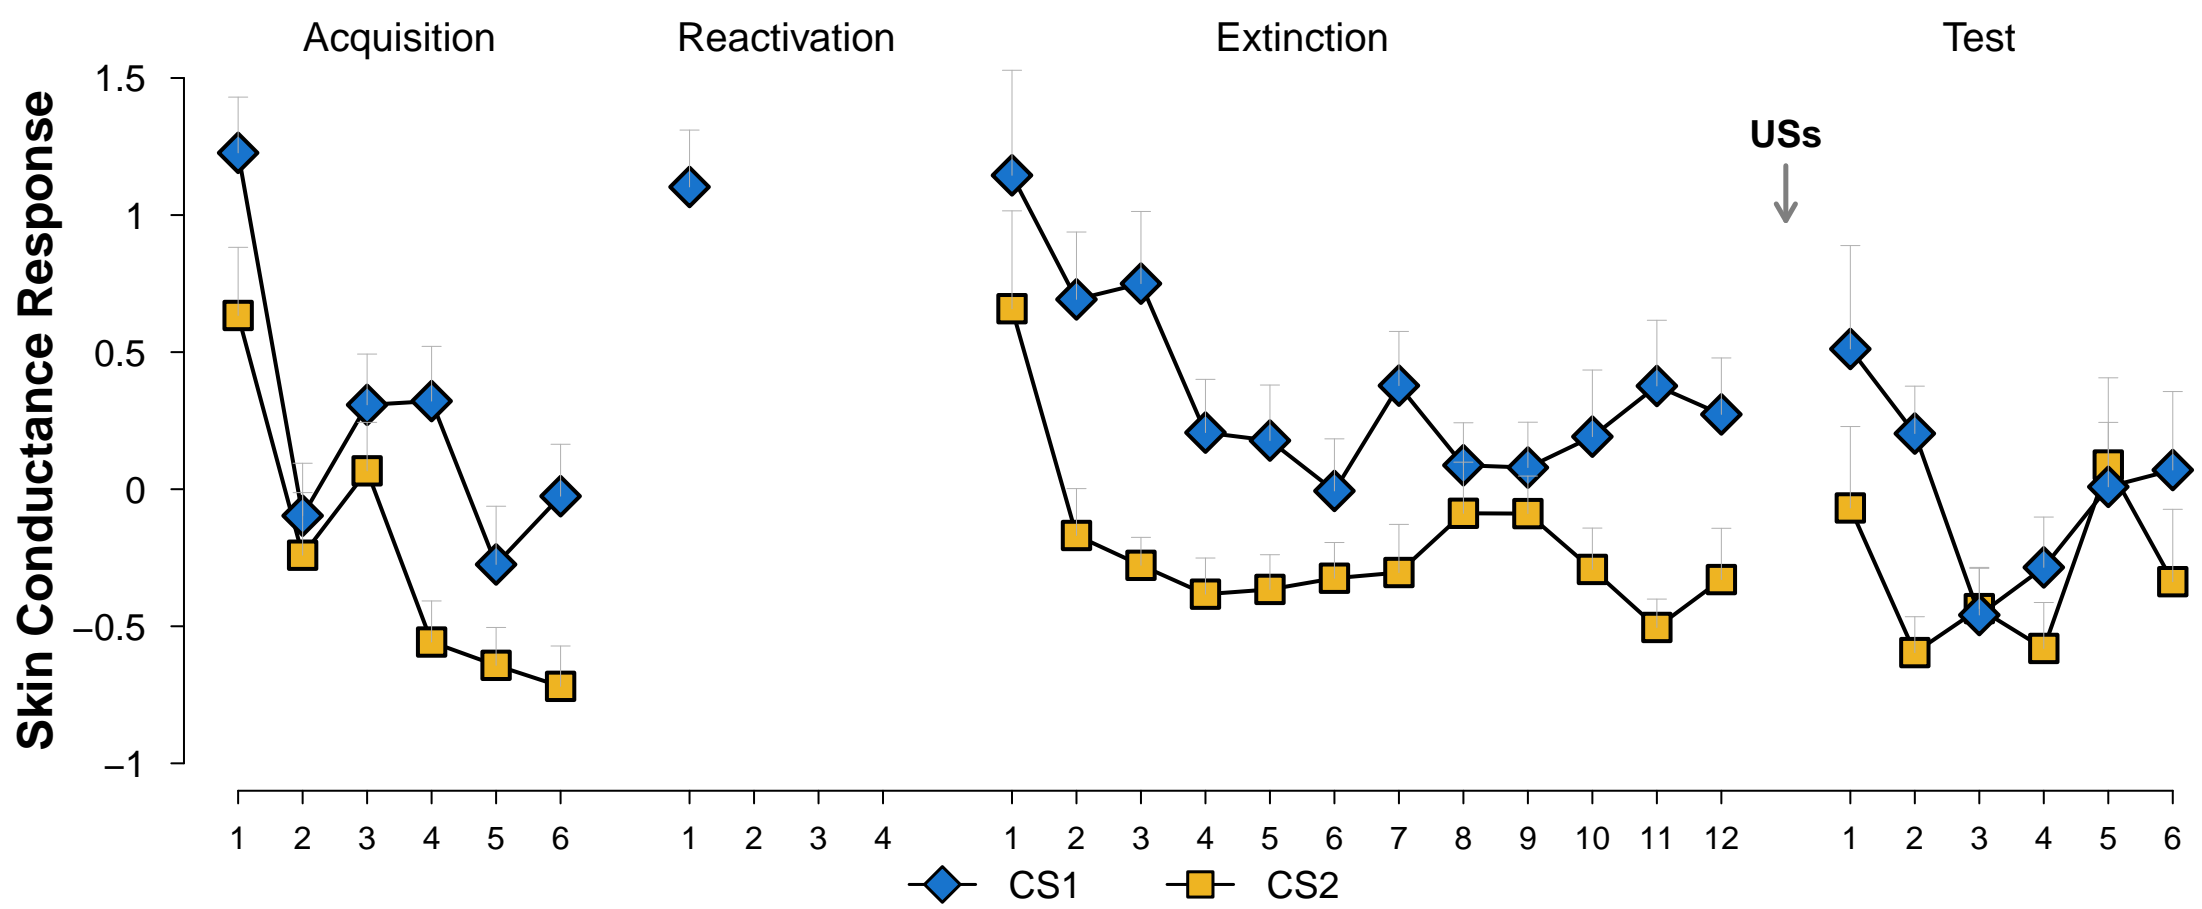

# B Single PE

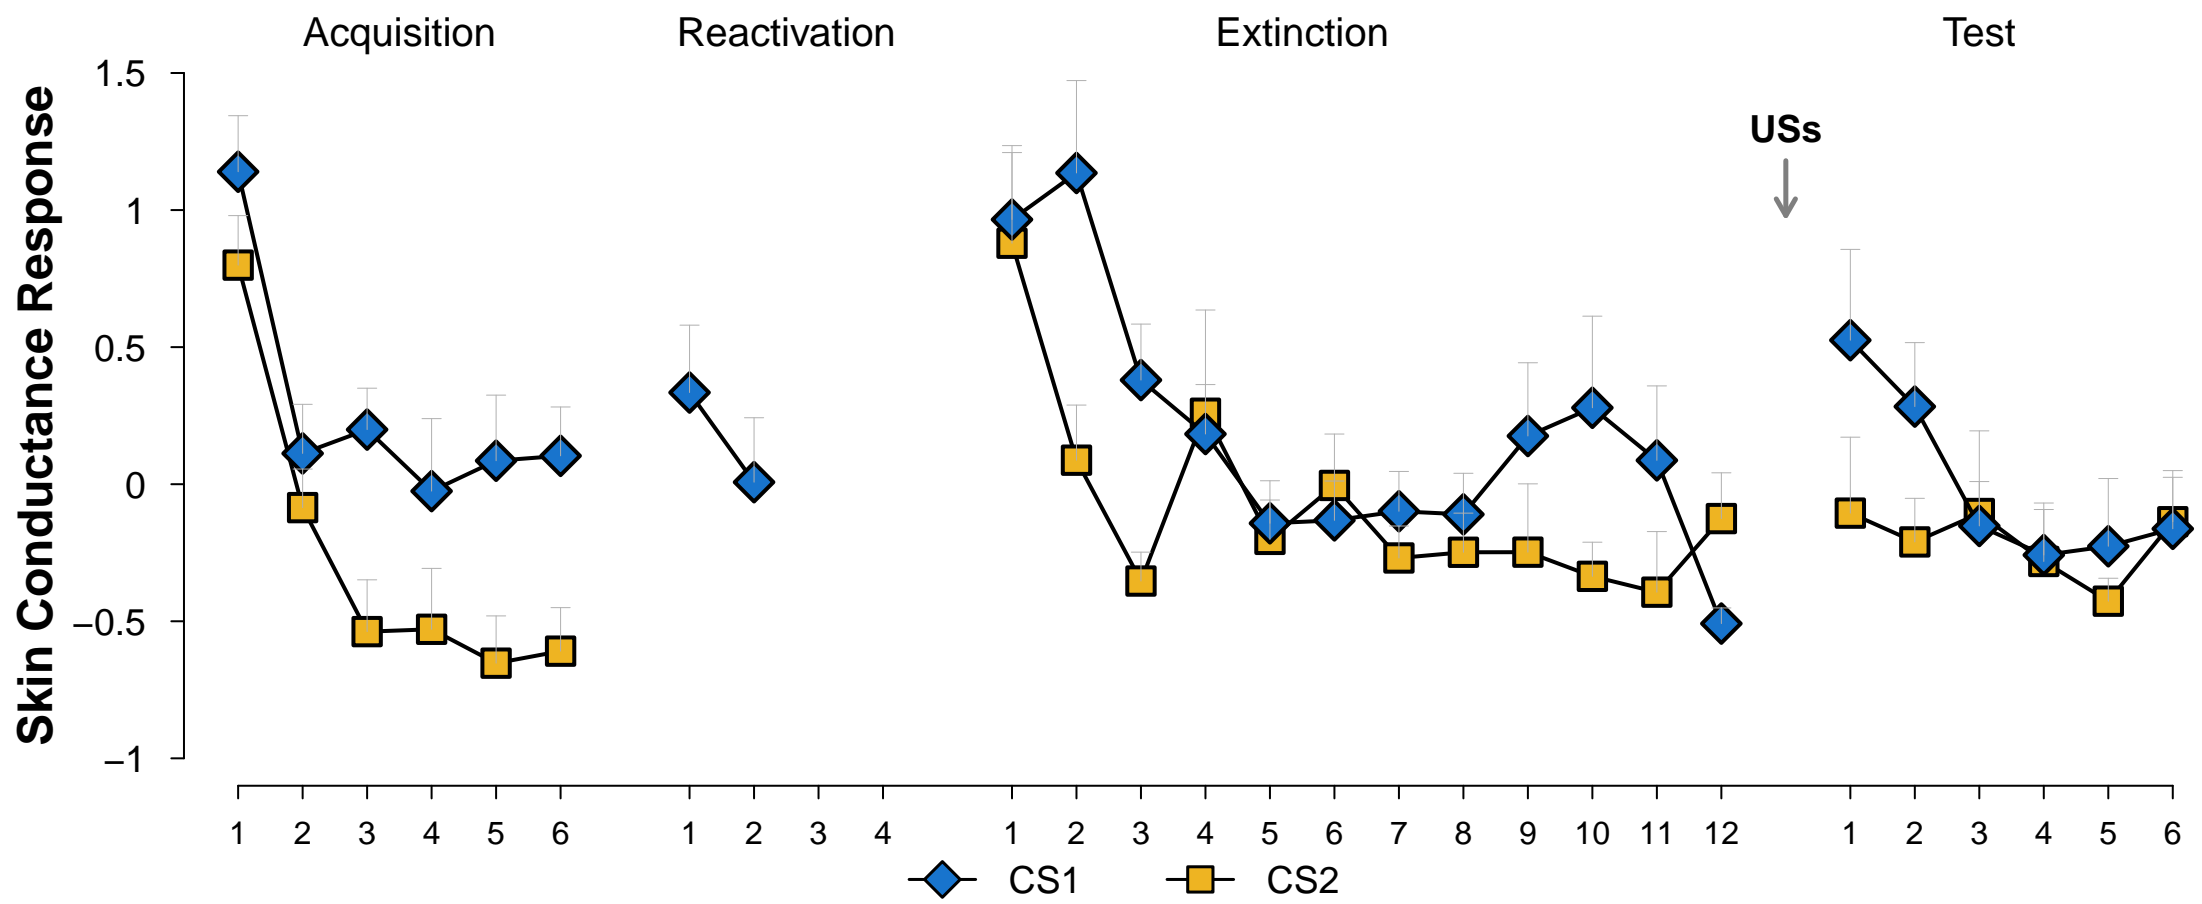

# C Multiple PEs

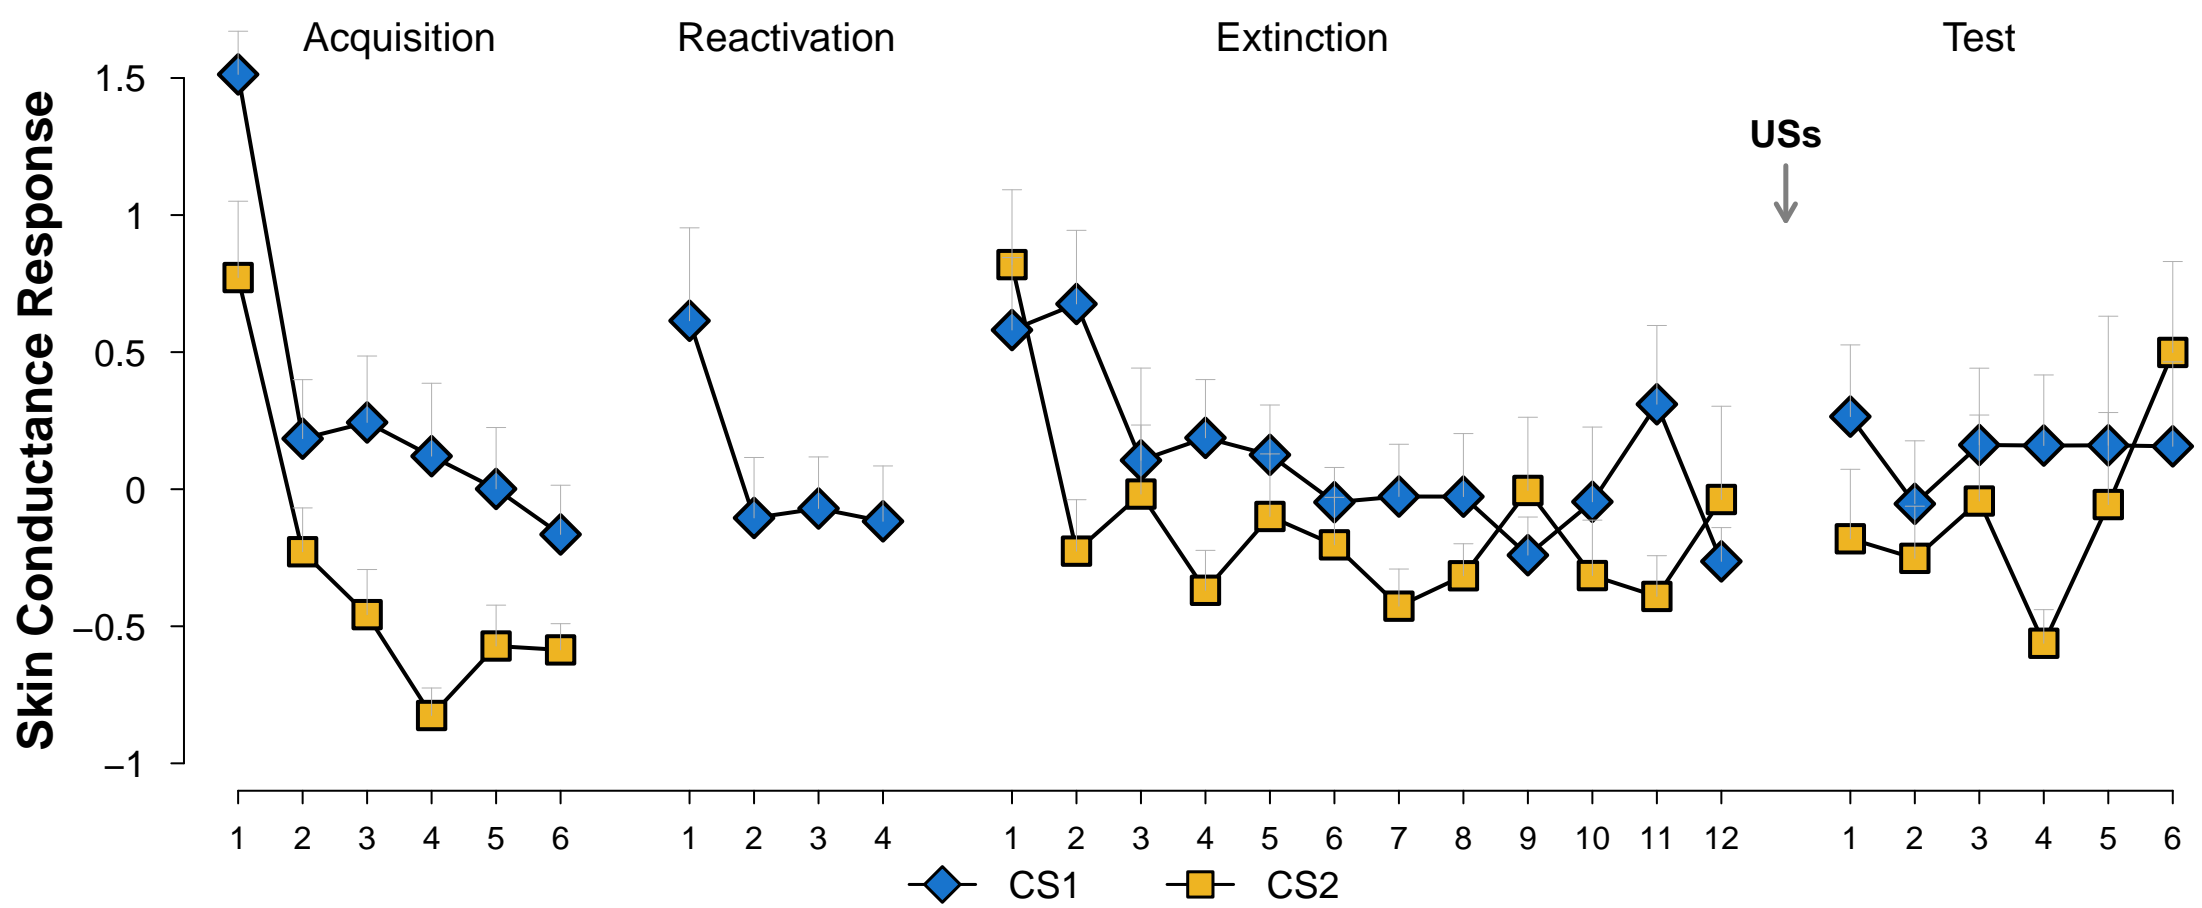

Supplement: supp_21.11.580_Figure_S1_Kindt.pdf [file supp_21.11.580_Figure_S1_Kindt.pdf]
